# Supplementary material for: BMP4 Protects Rat Pulmonary Arterial Smooth Muscle Cells from Apoptosis by PI3K/AKT/Smad1/5/8 Signaling
Source: PubMed Central journal article supplement (PMC4159822; doi:10.3390/ijms150813738), 2014-08-08

## Supplementary Information

**Figure S1.** (A–C) AKT isoforms protein expression in rat pulmonary arteries homogenates from normoxic and hypoxic rats; (D,E) BMP4 induced activation of AKT1, AKT2 in PSMCs. BMP4 up-regulated the expression of phosphorylation of AKT1 and AKT2 in a concentration-dependent manner. All values are denoted as the mean  $\pm$  SEM from at least three separate experiments. \*  $p < 0.05$ ; \*\*  $p < 0.01$ .

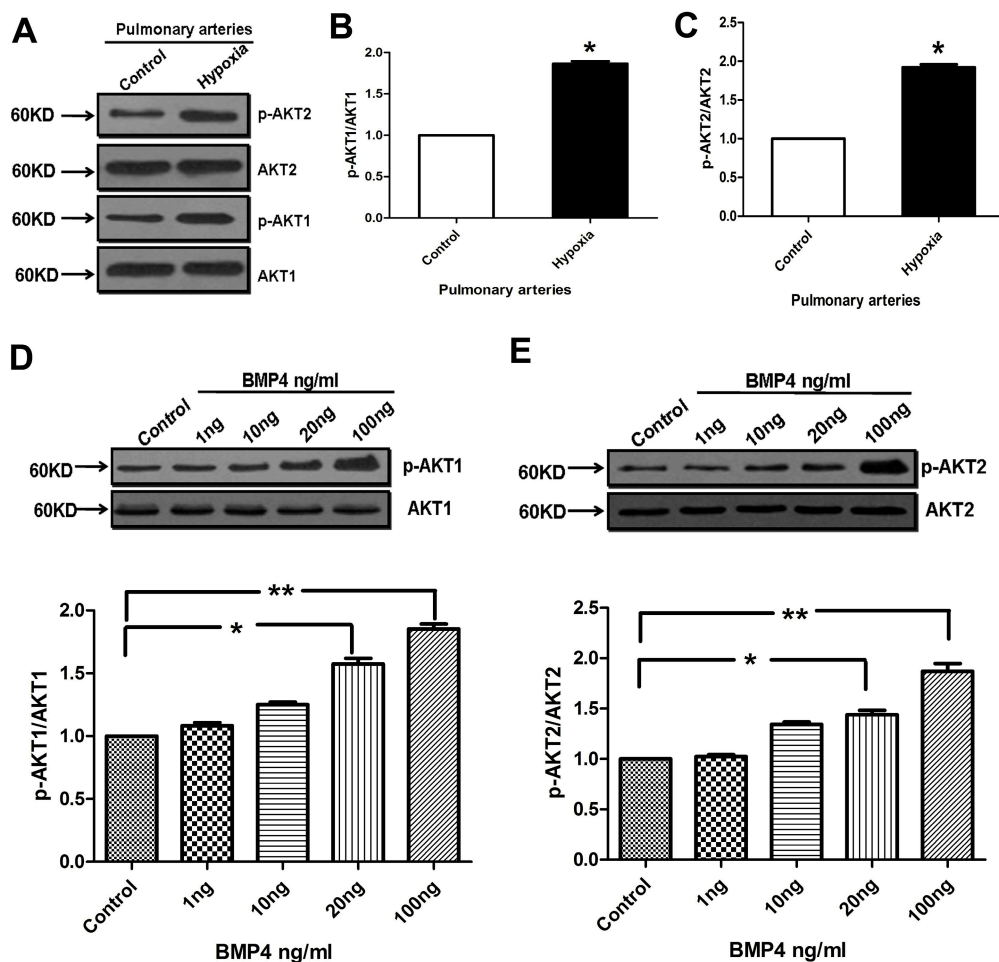

**Figure S2. (A,B)** The effect of hypoxia on BMP receptors expression in different time course. Cultured HPASMCs were exposed to hypoxia for 0 h as control, 12, 24, 48, 72 h respectively; hypoxia increased the protein expression of BMPR2 in a time-dependent manner. There were no significant differences in the protein levels of BMPR1A; **(C)** Hypoxia induced the generation of endogenous BMP4 in HPAECs in a time-dependent manner. All values are denoted as the mean  $\pm$  SEM from at least three separate experiments. \*  $p < 0.05$ ; \*\*  $p < 0.01$ .

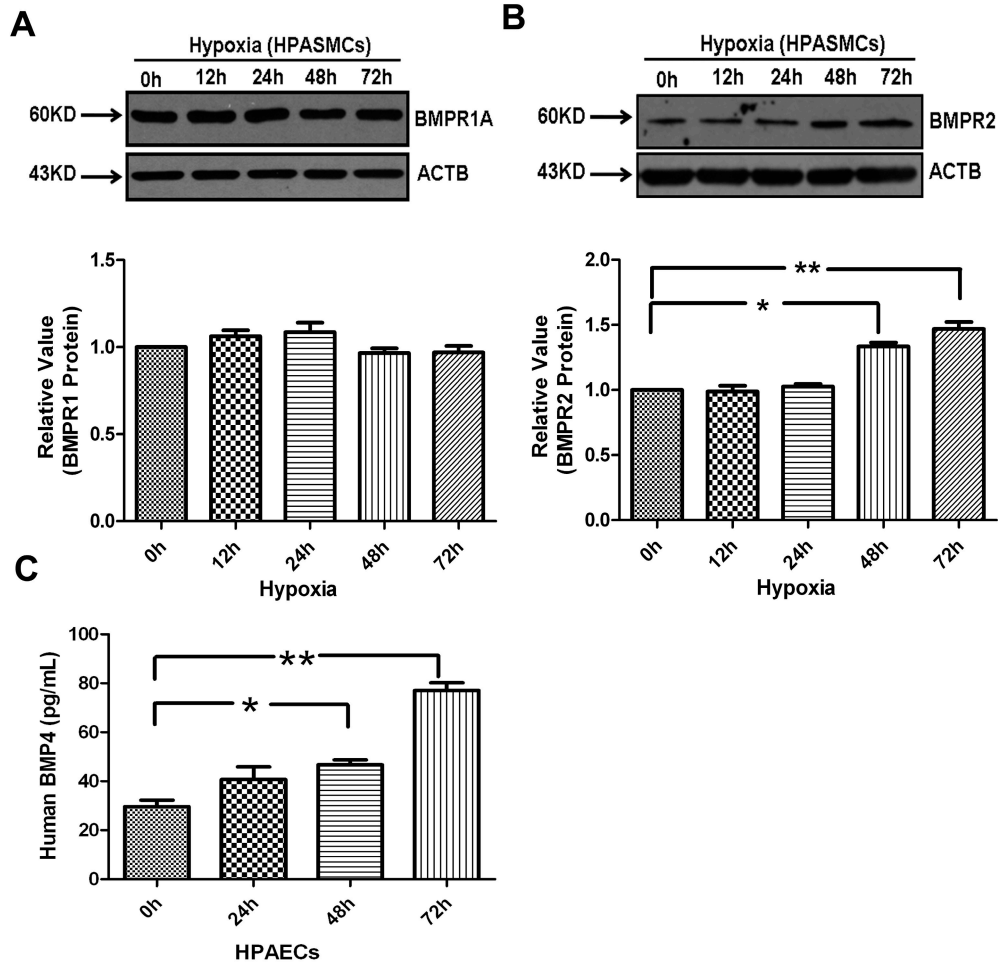

**Figure S3.** Effects of knockdown of the expression of *BMPR2* on the activation of Smad1/5/8. Cells were fixed and stained with anti-p-Smad1/5/8 and the nucleus was stained with DAPI. The phosphorylation of Smad1/5/8 was activated by BMP4 treatment in rat PSMCs. On the basis, we treated PSMCs with si-BMPR2, and we found that the activation of p-Smad1/5/8 still existed, but the effect was eliminated by the PI3K/AKT inhibitors LY294002 and wortmannin. Scale bar =10  $\mu$ m.

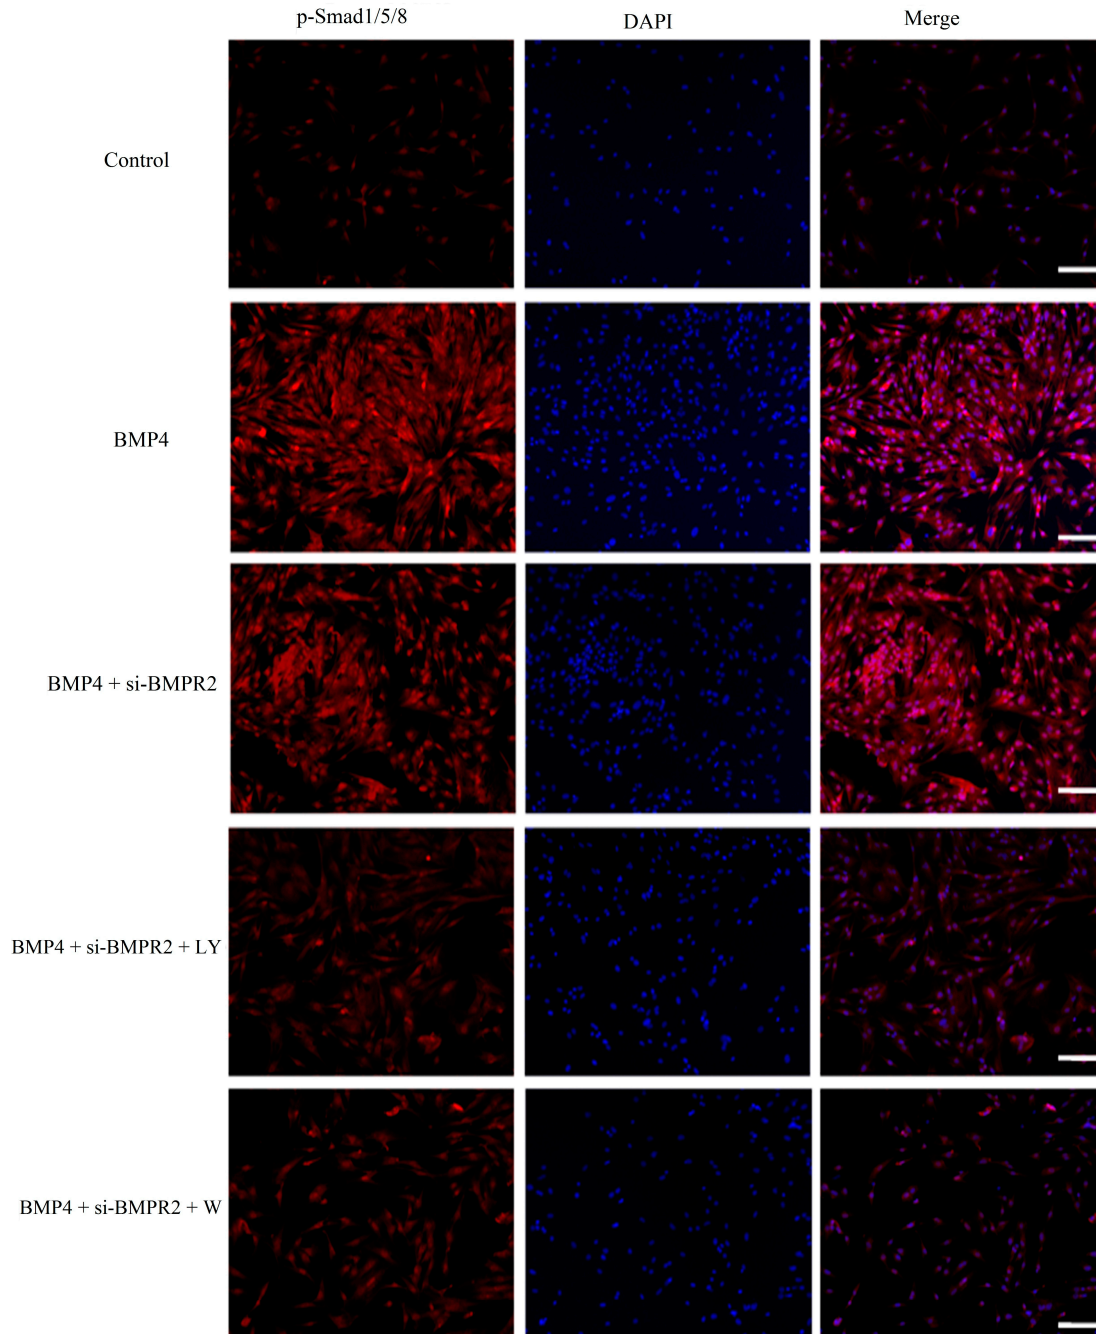

Supplement: ijms-15-13738-s001.pdf [file ijms-15-13738-s001.pdf]
